# Supplementary material for: In situdesign of Cu and Co nanoparticles encapsulated in N-doped graphene with core–shell structure-derived 8-hydroxyquinoline complexes for the selective catalytic reduction of NOxby NH3
Source: Royal Society of Chemistry journal article supplement (doi:10.1039/d0nj01513j), 2020-01-01
Supplement: d0nj01513j1.pdf [file d0nj01513j1.pdf]

**In situ design of Cu and Co nanoparticles encapsulated in N-doped graphene  
with core-shell structure derived 8-hydroxyquinoline complexes for the selective  
catalytic reduction of NO<sub>x</sub> by NH<sub>3</sub>**

Zhifang Li,<sup>a</sup> Jian Yang,<sup>a</sup> Xiaoyu Ma,<sup>a</sup> Jinxing Cui<sup>ab</sup>, Yuanyuan Ma,<sup>c</sup> Cui Geng<sup>c</sup>, Yan  
Kang,<sup>c</sup> and Changlong Yang<sup>\*a</sup>

<sup>a</sup>Address College of Materials Science and Engineering, Heilongjiang Province Key  
Laboratory of Polymeric Composite Material, Qiqihar University, Wenhua Street 42,  
Qiqihar, 161006, China

<sup>b</sup>Address College of Materials Science and Engineering, Graphene Functional  
Materials Research Laboratory, Qiqihar University, Wenhua Street 42, Qiqihar,  
161006, China

<sup>c</sup>Address College of Chemistry and Chemical Engineering, Qiqihar University,  
Qiqihar 161006, China

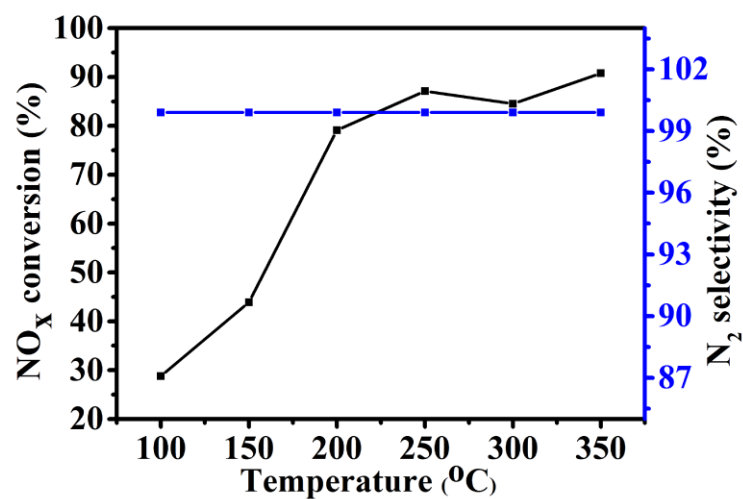

Fig. S1 NH<sub>3</sub>-SCR activity and N<sub>2</sub> selectivity of Co@N-Gr-800.

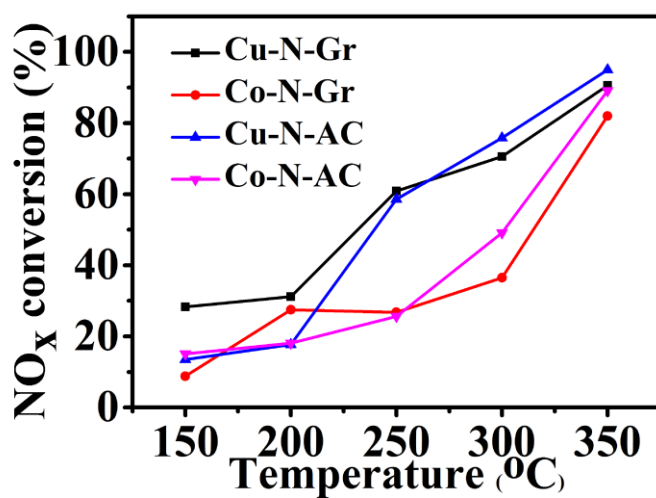

Fig. S2 NH<sub>3</sub>-SCR activity of Cu-N-Gr, Co-N-Gr, Cu-N-AC and Co-N-AC.

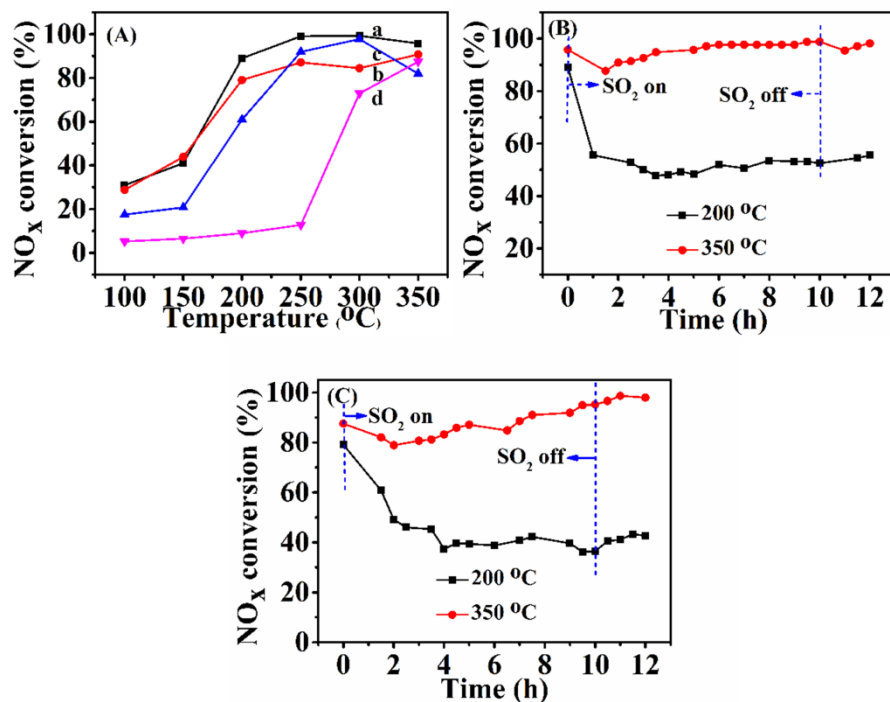

**Fig. S3** Influences of SO<sub>2</sub> on NO<sub>x</sub> conversion (A) (a) Cu@N-Gr-800 without SO<sub>2</sub>, (b) Co@N-Gr-800 without SO<sub>2</sub>, (c) Cu@N-Gr-800 with SO<sub>2</sub>, (d) Co@N-Gr-800 with SO<sub>2</sub> at different temperature (B) Cu@N-Gr-800 and (C) Co@N-Gr-800 at 200 °C and 350 °C for different reaction time.

**Table S1** The textural properties of Cu@N-Gr-800 and Co@N-Gr-800

| Sample      | Surface area (m <sup>2</sup> /g) | Average pore diameter (nm) |
|-------------|----------------------------------|----------------------------|
| Cu@N-Gr-800 | <5                               | 4.1                        |
| Co@N-Gr-800 | 174                              | 4.2                        |

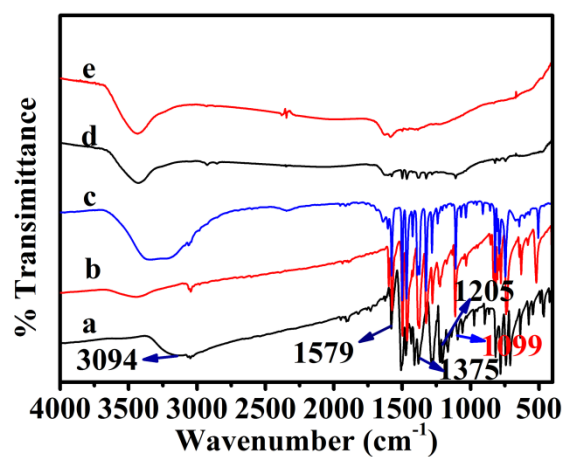

**Fig. S4** FT-IR spectra of (a) 8-Q, (b) Cu-8-Q, (c) Co-8-Q, (d) Cu@N-Gr-800 and (e) Co@N-Gr-800

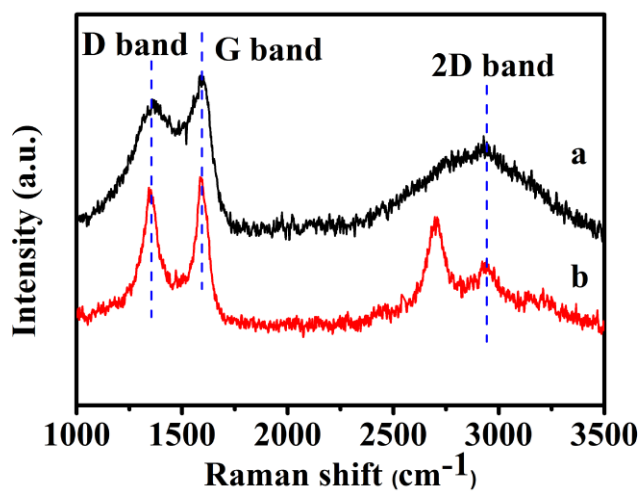

**Fig. S5** Raman spectra of (a) Cu@N-Gr-800 and (b) Co@N-Gr-800.

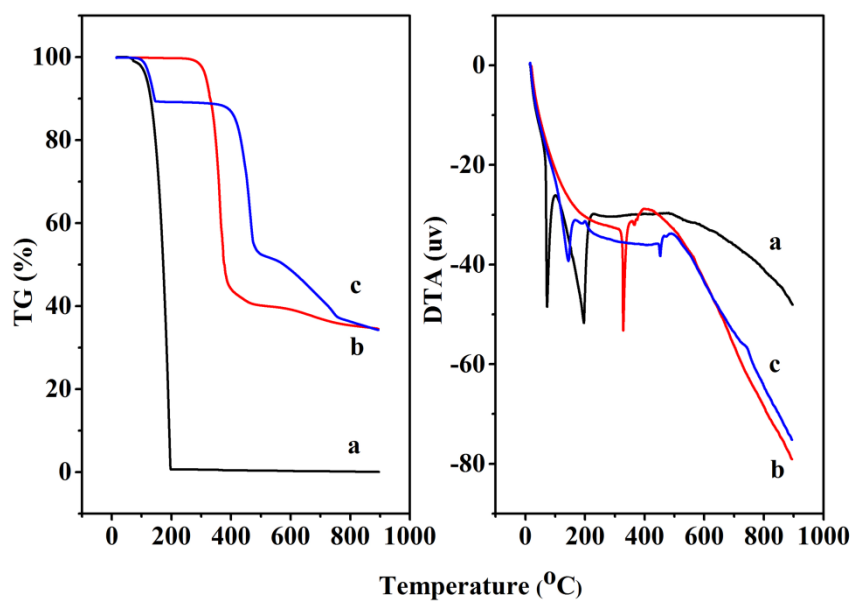

**Fig. S6** TG/DTA curves of (a) 8-Q, (b) Cu-8-Q and (c) Co-8-Q

The contents of C, H, N, Cu and Co were measured by carbon hydrogen nitrogen elements analysis instrument and ICP-AES. The contents of C, H, N, Cu and Co are as follows.

Found for Cu-8-Q: C, 61.24%; H, 3.80; N, 7.90; Cu, 17.65%. Calc. for  $C_{18}H_{14}N_2O_2Cu$ : C, 60.96%; H, 3.95; N, 7.90; Cu, 18.06%.

Found for Co-8-Q: C, 61.69%; H, 3.96; N, 7.95; Co, 16.50%. Calc. for  $C_{18}H_{14}N_2O_2Co$ : C, 61.83%; H, 4.0; N, 8.02; Co, 16.89%.

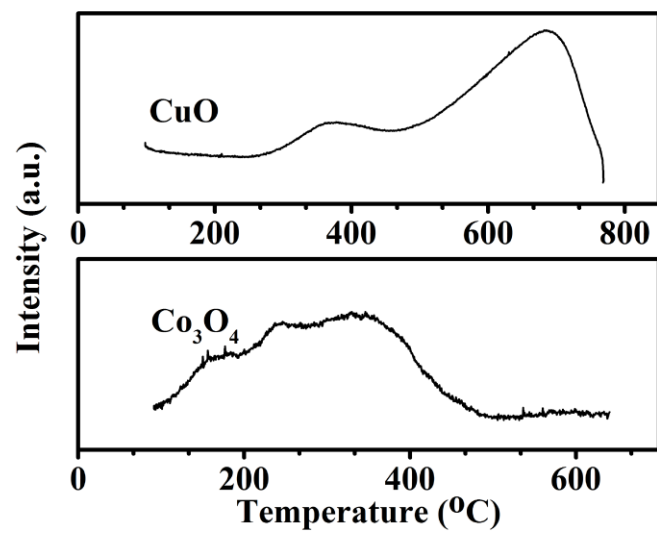

**Fig. S7**  $\text{NH}_3$ -TPD of  $\text{CuO}$  and  $\text{Co}_3\text{O}_4$ .
